# Supplementary material
Source: PubMed Central journal article supplement (PMC3633659)
Supplement: NIHMS447058-supplement-251_2013_686_MOESM2_ESM.pdf [file NIHMS447058-supplement-251_2013_686_MOESM2_ESM.pdf]

**Supplemental Table 1. Measured affinities of assay reference ligands and negative controls.**

| <b>Mamu assay</b> | <b>Peptide</b>   | <b>Sequence</b> | <b>IC50 nM<br/>(geomean)</b> | <b>SD<br/>(* / ÷)<sup>a</sup></b> |
|-------------------|------------------|-----------------|------------------------------|-----------------------------------|
| A2*01:02          | Ligand           | SHSHVGYTL       | 0.53                         | 2.7                               |
|                   | Negative control | GKMDHVMAK       | 43212                        | 1.3                               |
| A7*01:03          | Ligand           | RAEDNADYL       | 0.71                         | 3.9                               |
|                   | Negative control | KIILSQEQE       | >75000                       | -                                 |
| B*066:01          | Ligand           | YFAIAENESK      | 0.39                         | 2.7                               |
|                   | Negative control | FTLPSVNNA       | 9027                         | 2.3                               |
| B*090:01          | Ligand           | MSAPPAEYK       | 0.27                         | 2.9                               |
|                   | Negative control | VVMAYVGIK       | 6889                         | 2.3                               |
| B*010:01          | Ligand           | SHIDRVYTL       | 0.41                         | 3.0                               |
|                   | Negative control | SRYWAIRTR       | 28084                        | 2.1                               |
| B*087:01          | Ligand           | SDIDGDYRV       | 0.43                         | 1.8                               |
|                   | Negative control | CDKHYWDAI       | 11402                        | 1.4                               |

<sup>a</sup> Standard deviations of the geometric mean of the IC50 nM concentrations
