# Supplementary material
Source: PubMed Central journal article supplement (PMC3633659)
Supplement: NIHMS447058-supplement-251_2013_686_MOESM3_ESM.pdf [file NIHMS447058-supplement-251_2013_686_MOESM3_ESM.pdf]

**Supplemental Table 2. Natural ligands eluted from common Chinese MHC class I allelic molecules**

| Mamu allele       | Sequence                  | Length |
|-------------------|---------------------------|--------|
| A2*01:02          | AHQFLQNEY                 | 9      |
|                   | HSKVLYVY                  | 8      |
|                   | <b>SHSHVGYTL</b>          | 9      |
|                   | SHITPSTQQHL               | 11     |
|                   | SHSSHFSEF                 | 9      |
|                   | SHSPLRTEY                 | 9      |
|                   | SHSQITRLY                 | 9      |
|                   | AHNAVVEL                  | 9      |
|                   | NHFEGHYQY                 | 9      |
|                   | SHDHPTDVDY                | 10     |
|                   | VHNPDVITY                 | 9      |
|                   | SHNPNTTNNF                | 10     |
|                   | SHMEFYNQY                 | 9      |
|                   | THAPTHSDY                 | 9      |
|                   | SHIPQSSY                  | 9      |
| YHSPYPEEY         | 9                         |        |
| IHSPVVNEL         | 9                         |        |
| QHAKDFKEY         | 9                         |        |
| A7*01:03          | STEEKAYEI                 | 9      |
|                   | SVQTTEGEQI                | 10     |
|                   | RAENTQEEL                 | 9      |
|                   | RAEDNADTL                 | 9      |
|                   | <b>RAEDNADYL (analog)</b> | 9      |
| ATESVQDVL         | 9                         |        |
| B*010:01          | RHVMLPREL                 | 9      |
|                   | NHHFFDGTAL                | 11     |
|                   | RHISIQRL                  | 9      |
|                   | DHIRFISEL                 | 9      |
|                   | VRVPARVL                  | 8      |
|                   | THVMDYRAL                 | 9      |
|                   | VHAPPMQLGF                | 10     |
|                   | NQQEFVRL                  | 9      |
|                   | <b>SHIDRVYTL</b>          | 9      |
|                   | NHQQPPQNTGF               | 12     |
|                   | ANLKVSI                   | 8      |
|                   | SQSPQGRVM                 | 9      |
|                   | DHARLQLQL                 | 9      |
|                   | NQSKFFRVL                 | 9      |
|                   | IHQDGIHIL                 | 9      |
|                   | NHEGEVNRARYM              | 12     |
|                   | HHVENKGATL                | 10     |
|                   | IHEDSTNRRRL               | 11     |
|                   | NHEDGPTAKKL               | 11     |
|                   | NHREAGKEAAL               | 11     |
|                   | VHAPSSRRRTL               | 11     |
|                   | WHADGRLTKKL               | 11     |
|                   | NQDRYIKKL                 | 9      |
|                   | NHHLQETSF                 | 9      |
|                   | VHFEESKL                  | 9      |
|                   | VHSDAAKQI                 | 9      |
|                   | HHADKALTM                 | 9      |
| IRSSYIRVL         | 9                         |        |
| RHKsDSISL         | 9                         |        |
| SHAQTVVL          | 8                         |        |
| B*066:01          | AGFAGDDAPR                | 10     |
|                   | AGASGGAYEHR               | 11     |
|                   | AQIDEKTEK                 | 9      |
|                   | AVAAVAARR                 | 9      |
|                   | HGAAPDISVK                | 10     |
|                   | KTYIPPKGETK               | 11     |
|                   | LTAAKKARAG                | 10     |
|                   | SPEKNRPL                  | 9      |
|                   | SLADIMAKR                 | 9      |
|                   | TSSEITTKDLK               | 11     |
|                   | YGINTDPPK                 | 9      |
|                   | YGYEGIDAVK                | 10     |
|                   | FAIAENESK                 | 9      |
| <b>YFAIAENESK</b> | 10                        |        |
| B*087:01          | RIEELGSKAKF               | 12     |
|                   | HIDEVQNEIDRL              | 12     |
|                   | RDIDAATEAKHRL             | 13     |
|                   | ALDTSEQERM                | 10     |
|                   | TEDDPQSQHM                | 10     |
|                   | KDIDPEGKKFDRV             | 13     |
|                   | ADENPKSTL                 | 10     |
|                   | ADIEPKFDRL                | 10     |
|                   | ADDSSSRDSF                | 10     |
|                   | ADIDGDGQVNYEEF            | 14     |
|                   | SIDVGYERF                 | 9      |
|                   | GDVEKLSKF                 | 9      |
|                   | NDIsPESSPGVGR             | 13     |
|                   | FDDEANHLL                 | 9      |
|                   | <b>SDIDGYRV</b>           | 9      |
|                   | SLDPGPLEQF                | 10     |
|                   | VLDEADEML                 | 9      |
|                   | GLDDPRLEKL                | 10     |
|                   | KLDRPRFERV                | 10     |
|                   | KLDDNEALIEKL              | 12     |
|                   | FIDKEDLHDML               | 11     |
|                   | FLDEKTHELL                | 10     |
|                   | KDVEKFIRL                 | 9      |
|                   | VDIsPTRLHSL               | 11     |
|                   | RDLAPEVEKL                | 10     |
|                   | HDISPQAPTHFL              | 12     |
|                   | RDIDPIITRL                | 10     |
| B*090:01          | Not tested                |        |
