# Supplementary material
Source: PubMed Central journal article supplement (PMC3633659)
Supplement: NIHMS447058-supplement-251_2013_686_MOESM4_ESM.pdf [file NIHMS447058-supplement-251_2013_686_MOESM4_ESM.pdf]

**Supplemental Table 3.** PSCL-derived matrices describing 9-mer binding to six common Chinese rhesus MHC class I alleles

**a) Mamu-A2\*01:02<sup>a</sup>**

| Residue | Position |       |       |       |       |       |       |       |       |
|---------|----------|-------|-------|-------|-------|-------|-------|-------|-------|
|         | 1        | 2     | 3     | 4     | 5     | 6     | 7     | 8     | 9     |
| A       | 1.000    | 0.012 | 0.257 | 0.388 | 0.126 | 0.485 | 0.333 | 0.357 | 0.022 |
| C       | 0.203    | 0.014 | 0.088 | 0.156 | 0.096 | 0.437 | 0.213 | 0.192 | 0.033 |
| D       | 0.098    | 0.013 | 0.193 | 0.246 | 0.031 | 0.172 | 0.085 | 0.068 | 0.009 |
| E       | 0.037    | 0.004 | 0.007 | 0.023 | 0.021 | 0.113 | 0.102 | 0.048 | 0.018 |
| F       | 0.287    | 0.018 | 0.396 | 0.469 | 1.000 | 1.000 | 0.683 | 0.161 | 0.144 |
| G       | 0.755    | 0.004 | 0.165 | 0.434 | 0.144 | 0.313 | 0.217 | 0.085 | 0.015 |
| H       | 0.443    | 1.000 | 0.041 | 0.218 | 0.098 | 0.262 | 0.286 | 0.044 | 0.014 |
| I       | 0.275    | 0.062 | 1.000 | 0.412 | 0.144 | 0.394 | 1.000 | 1.000 | 0.062 |
| K       | 0.386    | 0.041 | 0.033 | 0.448 | 0.029 | 0.128 | 0.156 | 0.133 | 0.044 |
| L       | 0.067    | 0.007 | 0.155 | 0.209 | 0.122 | 0.633 | 0.395 | 0.175 | 0.225 |
| M       | 0.486    | 0.050 | 0.501 | 0.713 | 0.114 | 0.584 | 0.647 | 0.214 | 0.201 |
| N       | 0.333    | 0.021 | 0.190 | 0.516 | 0.036 | 0.188 | 0.575 | 0.061 | 0.015 |
| P       | 0.031    | 0.004 | 0.047 | 0.578 | 0.053 | 0.360 | 0.110 | 0.216 | 0.008 |
| Q       | 0.180    | 0.075 | 0.140 | 0.467 | 0.104 | 0.370 | 0.278 | 0.135 | 0.004 |
| R       | 0.819    | 0.069 | 0.032 | 0.463 | 0.057 | 0.143 | 0.057 | 0.143 | 0.004 |
| S       | 0.588    | 0.019 | 0.316 | 0.492 | 0.081 | 0.690 | 0.301 | 0.129 | 0.016 |
| T       | 0.722    | 0.019 | 0.178 | 0.364 | 0.112 | 0.476 | 0.133 | 0.213 | 0.016 |
| V       | 0.412    | 0.025 | 0.174 | 0.901 | 0.330 | 0.851 | 0.261 | 0.115 | 0.050 |
| W       | 0.109    | 0.012 | 0.038 | 1.000 | 0.378 | 0.013 | 0.580 | 0.214 | 0.307 |
| Y       | 0.129    | 0.022 | 0.096 | 0.409 | 0.194 | 0.866 | 0.437 | 0.701 | 1.000 |
| Geomean | 0.250    | 0.022 | 0.118 | 0.365 | 0.102 | 0.311 | 0.264 | 0.157 | 0.034 |
| SD      | 2.8      | 3.6   | 3.2   | 2.2   | 2.5   | 2.7   | 2.2   | 2.2   | 4.4   |
| SF      | 0.518    | 5.950 | 1.096 | 0.355 | 1.268 | 0.418 | 0.491 | 0.827 | 3.865 |

**b) Mamu A7\*01:03<sup>a</sup>**

| Residue | Position |       |       |       |       |       |       |       |       |
|---------|----------|-------|-------|-------|-------|-------|-------|-------|-------|
|         | 1        | 2     | 3     | 4     | 5     | 6     | 7     | 8     | 9     |
| A       | 0.178    | 0.309 | 0.014 | 0.790 | 0.240 | 0.276 | 0.096 | 0.425 | 0.102 |
| C       | 0.131    | 0.019 | 0.050 | 0.989 | 0.287 | 0.091 | 0.061 | 0.652 | 0.122 |
| D       | 0.006    | 0.006 | 0.072 | 0.665 | 0.273 | 0.448 | 0.931 | 0.337 | 0.011 |
| E       | 0.005    | 0.019 | 0.002 | 0.061 | 0.046 | 0.072 | 0.309 | 0.023 | 0.022 |
| F       | 0.418    | 0.022 | 0.057 | 1.000 | 1.000 | 0.260 | 1.000 | 0.215 | 0.222 |
| G       | 0.192    | 0.032 | 0.031 | 0.361 | 0.354 | 0.160 | 0.182 | 0.305 | 0.021 |
| H       | 0.916    | 0.010 | 0.027 | 0.146 | 0.110 | 0.168 | 0.339 | 0.055 | 0.018 |
| I       | 0.232    | 0.382 | 0.125 | 0.926 | 0.388 | 0.698 | 0.345 | 0.210 | 0.585 |
| K       | 0.677    | 0.037 | 0.008 | 0.265 | 0.026 | 0.035 | 0.019 | 0.031 | 0.049 |
| L       | 1.000    | 0.352 | 0.051 | 0.806 | 0.161 | 0.486 | 0.183 | 0.087 | 1.000 |
| M       | 0.235    | 0.260 | 1.000 | 0.649 | 0.503 | 1.000 | 0.350 | 0.123 | 0.514 |
| N       | 0.027    | 0.029 | 0.072 | 0.576 | 0.093 | 0.823 | 0.161 | 0.280 | 0.017 |
| P       | 0.013    | 0.004 | 0.006 | 0.409 | 0.050 | 0.065 | 0.301 | 0.200 | 0.029 |
| Q       | 0.173    | 0.035 | 0.812 | 0.450 | 0.235 | 0.376 | 0.222 | 1.000 | 0.032 |
| R       | 0.274    | 0.019 | 0.009 | 0.275 | 0.054 | 0.047 | 0.054 | 0.167 | 0.040 |
| S       | 0.083    | 1.000 | 0.073 | 0.698 | 0.750 | 0.232 | 0.399 | 0.103 | 0.016 |
| T       | 0.006    | 0.362 | 0.029 | 0.173 | 0.206 | 0.266 | 0.578 | 0.288 | 0.029 |
| V       | 0.041    | 0.579 | 0.009 | 0.304 | 0.644 | 0.339 | 0.684 | 0.280 | 0.415 |
| W       | 0.262    | 0.022 | 0.023 | 0.724 | 0.900 | 0.263 | 0.476 | 0.149 | 0.655 |
| Y       | 0.460    | 0.022 | 0.030 | 0.349 | 0.500 | 0.303 | 0.545 | 0.149 | 0.053 |
| Geomean | 0.111    | 0.054 | 0.036 | 0.435 | 0.220 | 0.224 | 0.251 | 0.177 | 0.073 |
| SD      | 5.373    | 5.169 | 4.451 | 2.079 | 2.895 | 2.552 | 2.748 | 2.537 | 4.286 |
| SF      | 1.215    | 2.482 | 3.780 | 0.311 | 0.613 | 0.602 | 0.538 | 0.762 | 1.863 |

c) Mamu-B\*010:01 <sup>a</sup>

| Residue | Position |       |       |       |       |       |       |       |        |
|---------|----------|-------|-------|-------|-------|-------|-------|-------|--------|
|         | 1        | 2     | 3     | 4     | 5     | 6     | 7     | 8     | 9      |
| A       | 0.153    | 0.132 | 0.347 | 0.529 | 0.456 | 1.000 | 0.227 | 1.000 | 0.013  |
| C       | 0.395    | 0.035 | 0.137 | 0.173 | 0.119 | 0.115 | 0.134 | 0.112 | 0.003  |
| D       | 0.323    | 0.065 | 0.193 | 0.099 | 0.223 | 0.305 | 0.060 | 0.052 | 0.003  |
| E       | 0.089    | 0.043 | 0.082 | 0.240 | 0.922 | 0.089 | 0.051 | 0.531 | 0.003  |
| F       | 0.096    | 0.057 | 0.292 | 0.197 | 0.880 | 0.248 | 0.388 | 0.318 | 1.000  |
| G       | 0.385    | 0.039 | 0.157 | 0.321 | 0.330 | 0.293 | 0.053 | 0.118 | 0.003  |
| H       | 1.000    | 1.000 | 0.536 | 0.165 | 0.178 | 0.388 | 1.000 | 0.039 | 0.003  |
| I       | 0.106    | 0.097 | 0.155 | 0.105 | 0.567 | 0.563 | 0.184 | 0.347 | 0.258  |
| K       | 0.103    | 0.030 | 0.055 | 0.233 | 0.138 | 0.067 | 0.169 | 0.103 | 0.008  |
| L       | 0.121    | 0.036 | 0.077 | 0.654 | 0.268 | 0.350 | 0.199 | 0.248 | 0.288  |
| M       | 0.248    | 0.047 | 0.117 | 0.352 | 0.113 | 0.809 | 0.784 | 0.147 | 0.504  |
| N       | 0.144    | 0.030 | 0.212 | 0.459 | 0.221 | 0.239 | 0.125 | 0.052 | 0.007  |
| P       | 0.107    | 0.040 | 0.123 | 0.720 | 0.373 | 0.296 | 0.062 | 0.814 | 0.006  |
| Q       | 0.516    | 0.051 | 0.129 | 0.305 | 0.126 | 0.491 | 0.094 | 0.702 | 0.004  |
| R       | 0.336    | 0.062 | 0.125 | 0.836 | 0.092 | 0.397 | 0.439 | 0.094 | 0.003  |
| S       | 0.199    | 0.066 | 1.000 | 1.000 | 0.695 | 0.779 | 0.046 | 0.589 | 0.003  |
| T       | 0.152    | 0.046 | 0.266 | 0.803 | 0.228 | 0.456 | 0.064 | 0.830 | 0.006  |
| V       | 0.108    | 0.042 | 0.140 | 0.482 | 0.442 | 0.199 | 0.056 | 0.621 | 0.034  |
| W       | 0.109    | 0.026 | 0.095 | 0.221 | 1.000 | 0.084 | 0.027 | 0.048 | 0.010  |
| Y       | 0.367    | 0.042 | 0.101 | 0.239 | 0.642 | 0.073 | 0.282 | 0.189 | 0.003  |
| Geomean | 0.197    | 0.056 | 0.164 | 0.329 | 0.308 | 0.274 | 0.135 | 0.215 | 0.013  |
| SD      | 1.988    | 2.192 | 1.997 | 1.979 | 2.143 | 2.265 | 2.718 | 2.938 | 6.971  |
| SF      | 0.703    | 2.484 | 0.840 | 0.420 | 0.448 | 0.504 | 1.026 | 0.642 | 10.922 |

d) Mamu-B\*066:01 <sup>a</sup>

| Residue | Position |       |       |       |       |       |       |       |        |
|---------|----------|-------|-------|-------|-------|-------|-------|-------|--------|
|         | 1        | 2     | 3     | 4     | 5     | 6     | 7     | 8     | 9      |
| A       | 0.099    | 0.547 | 0.231 | 0.308 | 0.055 | 0.337 | 0.674 | 0.103 | 0.058  |
| C       | 0.265    | 0.075 | 0.019 | 0.340 | 0.336 | 0.410 | 0.655 | 0.111 | 0.001  |
| D       | 0.004    | 0.004 | 0.011 | 1.000 | 0.090 | 0.324 | 0.494 | 0.025 | 0.002  |
| E       | 0.001    | 0.002 | 0.053 | 0.189 | 0.059 | 0.228 | 0.925 | 0.024 | 0.001  |
| F       | 1.000    | 0.056 | 1.000 | 0.471 | 1.000 | 0.590 | 1.000 | 0.635 | 0.005  |
| G       | 0.027    | 1.000 | 0.034 | 0.774 | 0.145 | 0.268 | 0.222 | 0.216 | 0.004  |
| H       | 0.053    | 0.010 | 0.057 | 0.250 | 0.093 | 0.269 | 0.205 | 0.225 | 0.072  |
| I       | 0.086    | 0.210 | 0.202 | 0.326 | 0.230 | 0.295 | 0.489 | 0.094 | 0.004  |
| K       | 0.720    | 0.010 | 0.036 | 0.150 | 0.016 | 0.075 | 0.054 | 0.072 | 1.000  |
| L       | 0.144    | 0.198 | 0.034 | 0.388 | 0.085 | 0.462 | 0.272 | 0.280 | 0.044  |
| M       | 0.249    | 0.788 | 0.349 | 0.123 | 0.201 | 0.330 | 0.356 | 0.149 | 0.013  |
| N       | 0.276    | 0.016 | 0.109 | 0.264 | 0.034 | 0.373 | 0.558 | 0.185 | 0.005  |
| P       | 0.003    | 0.007 | 0.101 | 0.783 | 0.078 | 0.279 | 0.281 | 0.272 | 0.001  |
| Q       | 0.016    | 0.283 | 0.039 | 0.161 | 0.056 | 0.703 | 0.409 | 0.173 | 0.007  |
| R       | 0.254    | 0.005 | 0.015 | 0.186 | 0.042 | 0.204 | 0.166 | 0.157 | 0.455  |
| S       | 0.109    | 0.409 | 0.193 | 0.187 | 0.128 | 0.588 | 0.546 | 0.054 | 0.009  |
| T       | 0.049    | 0.371 | 0.102 | 0.157 | 0.074 | 1.000 | 0.234 | 0.176 | 0.001  |
| V       | 0.067    | 0.106 | 0.172 | 0.146 | 0.222 | 0.728 | 0.441 | 1.000 | 0.017  |
| W       | 0.106    | 0.008 | 0.080 | 0.481 | 0.083 | 0.978 | 0.293 | 0.096 | 0.001  |
| Y       | 0.637    | 0.028 | 0.334 | 0.382 | 0.064 | 0.465 | 0.654 | 0.347 | 0.378  |
| Geomean | 0.075    | 0.053 | 0.083 | 0.292 | 0.097 | 0.382 | 0.373 | 0.148 | 0.011  |
| SD      | 6.266    | 7.177 | 3.196 | 1.846 | 2.465 | 1.822 | 1.973 | 2.525 | 8.929  |
| SF      | 1.454    | 2.034 | 1.304 | 0.372 | 1.117 | 0.285 | 0.291 | 0.734 | 10.250 |

e) Mamu-B\*087:01 <sup>a</sup>

| Residue | Position |       |       |       |       |       |       |       |       |
|---------|----------|-------|-------|-------|-------|-------|-------|-------|-------|
|         | 1        | 2     | 3     | 4     | 5     | 6     | 7     | 8     | 9     |
| A       | 0.106    | 0.047 | 0.005 | 0.338 | 0.480 | 0.179 | 0.094 | 0.041 | 0.010 |
| C       | 0.083    | 0.058 | 0.006 | 0.179 | 0.231 | 0.155 | 0.080 | 0.021 | 0.010 |
| D       | 0.255    | 1.000 | 1.000 | 1.000 | 0.968 | 1.000 | 1.000 | 0.032 | 0.010 |
| E       | 1.000    | 0.132 | 0.077 | 0.486 | 0.371 | 0.714 | 0.405 | 0.036 | 0.010 |
| F       | 0.355    | 0.136 | 0.211 | 0.254 | 0.225 | 0.286 | 0.034 | 1.000 | 0.708 |
| G       | 0.114    | 0.036 | 0.020 | 0.078 | 0.113 | 0.068 | 0.106 | 0.032 | 0.010 |
| H       | 0.071    | 0.023 | 0.010 | 0.085 | 0.085 | 0.060 | 0.050 | 0.009 | 0.010 |
| I       | 0.139    | 0.227 | 0.057 | 0.097 | 0.124 | 0.068 | 0.122 | 0.020 | 0.403 |
| K       | 0.093    | 0.044 | 0.005 | 0.122 | 0.061 | 0.032 | 0.011 | 0.017 | 0.019 |
| L       | 0.081    | 0.466 | 0.035 | 0.473 | 0.155 | 0.178 | 0.259 | 0.118 | 1.000 |
| M       | 0.190    | 0.630 | 0.071 | 0.267 | 0.092 | 0.518 | 0.676 | 0.025 | 0.678 |
| N       | 0.078    | 0.038 | 0.012 | 0.183 | 0.105 | 0.074 | 0.098 | 0.018 | 0.017 |
| P       | 0.087    | 0.057 | 0.010 | 0.164 | 0.155 | 0.182 | 0.032 | 0.035 | 0.010 |
| Q       | 0.209    | 0.169 | 0.012 | 0.346 | 0.041 | 0.066 | 0.065 | 0.071 | 0.015 |
| R       | 0.087    | 0.021 | 0.003 | 0.084 | 0.050 | 0.034 | 0.010 | 0.033 | 0.010 |
| S       | 0.271    | 0.041 | 0.110 | 0.341 | 0.234 | 0.156 | 0.087 | 0.041 | 0.010 |
| T       | 0.054    | 0.065 | 0.018 | 0.118 | 0.351 | 0.098 | 0.039 | 0.015 | 0.010 |
| V       | 0.065    | 0.040 | 0.017 | 0.196 | 0.663 | 0.055 | 0.079 | 0.032 | 0.144 |
| W       | 0.264    | 0.152 | 0.046 | 0.391 | 0.796 | 0.194 | 0.327 | 0.144 | 0.010 |
| Y       | 0.342    | 0.104 | 0.018 | 0.143 | 1.000 | 0.068 | 0.166 | 0.171 | 0.010 |
| Geomean | 0.143    | 0.091 | 0.025 | 0.210 | 0.203 | 0.129 | 0.095 | 0.041 | 0.028 |
| SD      | 2.108    | 2.961 | 4.189 | 1.998 | 2.663 | 2.602 | 3.359 | 2.889 | 5.714 |
| SF      | 0.582    | 0.916 | 3.352 | 0.397 | 0.412 | 0.649 | 0.877 | 2.015 | 2.988 |

f) to Mamu-B\*090:01 <sup>a</sup>

| Residue | Position |       |       |       |       |       |       |       |        |
|---------|----------|-------|-------|-------|-------|-------|-------|-------|--------|
|         | 1        | 2     | 3     | 4     | 5     | 6     | 7     | 8     | 9      |
| A       | 0.525    | 0.106 | 0.262 | 0.368 | 0.200 | 0.415 | 0.466 | 0.495 | 0.003  |
| C       | 0.100    | 0.087 | 0.143 | 0.307 | 0.194 | 0.435 | 0.342 | 0.116 | 0.003  |
| D       | 0.044    | 0.728 | 0.656 | 0.233 | 0.124 | 0.218 | 0.241 | 0.059 | 0.002  |
| E       | 0.061    | 0.090 | 0.078 | 0.057 | 0.201 | 0.137 | 0.211 | 0.046 | 0.005  |
| F       | 0.128    | 0.097 | 1.000 | 0.262 | 1.000 | 0.314 | 0.551 | 0.358 | 0.008  |
| G       | 0.059    | 0.072 | 0.111 | 0.236 | 0.591 | 0.226 | 0.825 | 0.639 | 0.003  |
| H       | 0.188    | 0.101 | 0.170 | 0.130 | 0.192 | 0.179 | 1.000 | 0.090 | 0.005  |
| I       | 0.295    | 0.308 | 0.431 | 0.171 | 0.135 | 0.261 | 0.689 | 0.047 | 0.010  |
| K       | 0.495    | 1.000 | 0.022 | 0.100 | 0.211 | 0.143 | 0.127 | 0.070 | 0.505  |
| L       | 0.138    | 0.285 | 0.114 | 0.927 | 0.365 | 0.179 | 0.262 | 0.179 | 0.026  |
| M       | 0.453    | 0.732 | 0.349 | 1.000 | 0.132 | 0.210 | 0.789 | 0.097 | 0.010  |
| N       | 0.081    | 0.103 | 0.122 | 0.236 | 0.368 | 0.508 | 0.497 | 0.112 | 0.005  |
| P       | 0.086    | 0.033 | 0.253 | 0.179 | 0.394 | 1.000 | 0.485 | 0.223 | 0.002  |
| Q       | 0.125    | 0.537 | 0.118 | 0.171 | 0.319 | 0.292 | 0.665 | 0.290 | 0.004  |
| R       | 1.000    | 0.096 | 0.029 | 0.127 | 0.115 | 0.206 | 0.190 | 0.612 | 1.000  |
| S       | 0.165    | 0.100 | 0.242 | 0.535 | 0.298 | 0.368 | 0.365 | 0.124 | 0.045  |
| T       | 0.204    | 0.094 | 0.640 | 0.197 | 0.129 | 0.616 | 0.223 | 0.110 | 0.008  |
| V       | 0.195    | 0.116 | 0.402 | 0.364 | 0.491 | 0.415 | 0.245 | 0.087 | 0.010  |
| W       | 0.175    | 0.073 | 0.288 | 0.737 | 0.579 | 0.020 | 0.237 | 0.136 | 0.004  |
| Y       | 0.212    | 0.064 | 0.426 | 0.507 | 0.183 | 0.246 | 0.727 | 1.000 | 0.069  |
| Geomean | 0.170    | 0.148 | 0.200 | 0.263 | 0.257 | 0.255 | 0.391 | 0.160 | 0.011  |
| SD      | 2.24     | 2.58  | 2.68  | 2.11  | 1.84  | 2.18  | 1.80  | 2.48  | 5.5    |
| SF      | 0.930    | 1.068 | 0.787 | 0.599 | 0.613 | 0.618 | 0.403 | 0.983 | 14.245 |

a) The PSCL was tested for binding, the data analyzed, and primary and secondary anchor positions defined, as described in the Materials and Methods. Values shown represent the average relative binding (ARB) of the corresponding library relative to other pools with the same fixed position. Values have been normalized to the optimal residue at the corresponding position. SD indicates the standard deviation between the ARB of pools at the same position. SF is the specificity factor, calculated as described in the Materials and Methods, representing the ratio of the average binding of the entire library to the average of pools at the indicated position. At the primary anchor positions (SF>2.4; blue shading), the most preferred residues, associated with an ARB >0.1 are highlighted by bold yellow font. Green shading highlights dominant secondary anchor positions; yellow indicates weak secondary anchors. The library average binding for Mamu-A2\*0102 was 4233 nM, 2076 nM for A7\*0103, 167 nM for B\*6601, and 5641 nM for B\*9001.
